# Supplementary material
Source: ML conference proceedings conference paper supplement (https://proceedings.neurips.cc/paper_files/paper/2023/hash/eb4b1f7feadcd124a59de6ff7b9196f3-Abstract.html)
Supplement: Supplementary file 1 [file eb4b1f7feadcd124a59de6ff7b9196f3-Supplemental-Conference.pdf]

## Appendix

### A Implementation Details

**Codebase.** Our major codebase is built upon the official implementation of RRL [25], which is publicly available on <https://github.com/facebookresearch/RRL> and includes the Adroit manipulation tasks [22]. The DexMV [21] tasks are from the official code <https://github.com/yzqin/dexmv-sim>. All the visual representations in our work are also available online, including RRL (pre-trained ResNet-50, provided in PyTorch officially), R3M (<https://github.com/facebookresearch/r3m>), MVP (<https://github.com/ir413/mvp>), VC-1 (<https://github.com/facebookresearch/eai-vc>), and FrankMocap (<https://github.com/facebookresearch/frankmocap>). This ensures the good reproducibility of our work. *We are also committed to releasing the code.*

**Network architecture for H-InDex.** The architecture employed by H-InDex is based on ResNet-50 [9], referred to as  $h_\theta$ . In the initial stage (Stage 1),  $h_\theta$  takes as input a  $224 \times 224$  RGB image and processes it to generate a compact vector of size 2048. In Stage 2, we modify  $h_\theta$  by removing the average pooling layer in the final layer, resulting in the image being decoded into a feature map with dimensions  $7 \times 7 \times 2048$ . Moving on to Stage 3,  $h_\theta$  once again produces a compact vector of size 2048, while simultaneously updating the statistics within the BatchNorm layers using the exponential moving average operation.

**Implementation details for Stage 2.** Our implementation strictly follows the previous work that also uses the self-supervised keypoint detection as objective [10, 13, 14]. We give a PyTorch-style overview of the learning pipeline below and refer to [10] for more implementation details. Notably, the visual representation  $h_\theta$  (24M) contains the majority of parameters, while all other modules in the pipeline maintain a parameter count ranging from 1M to 3M. We use 50 demonstration videos as training data for each task and train 100k iterations to ensure convergence with learning rate  $1 \times 10^{-4}$ . One of our core contributions is to only adapt the parameters in BatchNorm layers in  $h_\theta$ , and we emphasize that the learning objective is not our contribution, as it has been well explored in [10, 13, 14].

```
for _ in range(num_iters):
    # sample data
    source_view, target_view = next(data_iter) # 3x224x224

    # self-supervised keypoint-based reconstruction
    # h_theta is our visual representation
    feature_map = h_theta(target_view) # -> 7x7x2048
    keypoint_feat = keypoint_encoder(feature_map) # -> 30x56x56
    keypoint_feat = up_sampler(keypoint_feature) # -> 256x28x28
    apperance_feat = apperance_encoder(source_view) # -> 256x28x28
    target_view_recon = image_decoder([keypoint_feat, apperance_feat]) # -> 3x224x224

    # compute loss
    loss = perceptual_loss(target_view, target_view_recon)

    # compute gradient and update model
    optimizer.zero_grad()
    loss.backward()
    optimizer.step()
```

### B Task Descriptions

In this section, we briefly introduce our tasks. We use an Adroit dexterous hand for manipulation tasks. The task design follows Adroit [22] and DexMV [21]. Visualizations of task trajectories are available at [h-index-rl.github.io](https://h-index-rl.github.io).

**Hammer (Adroit).** It requires the robot hand to pick up the hammer on the table and use the hammer to hit the nail.

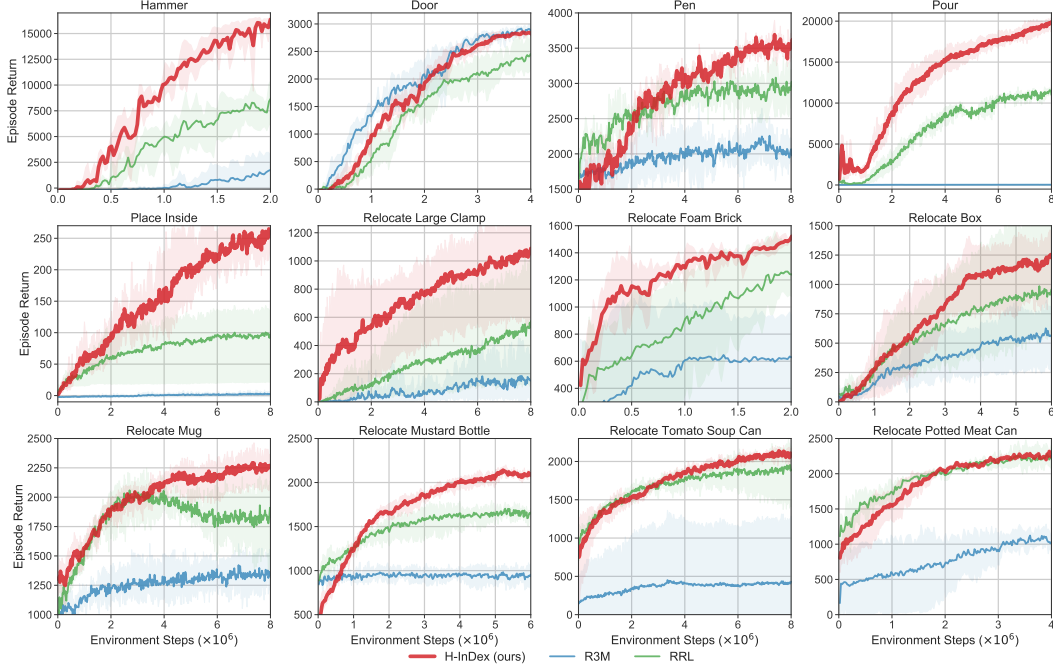

Figure 9: Episode return for **12** challenging dexterous manipulation tasks. Mean of 3 seeds with seed number 0, 1, 2. Shaded area indicates 95% CIs.

- 418 **Door (Adroit)**. It requires the robot hand to open the door on the table.
- 419 **Pen (Adroit)**. It requires the robot hand to orient the pen to the target orientation.
- 420 **Pour (DexMV)**. It requires the robot hand to reach the mug and pour the particles inside into a
- 421 container.
- 422 **Place inside (DexMV)**. It requires the robot hand to place the object on the table into the mug.
- 423 **Relocate YCB objects [2] (DexMV)**. It requires the robot hand to pick up the object on the table to
- 424 the target location. The objects in our tasks include *foam brick*, *box*, *mug*, *mustard bottle*, *tomato*
- 425 *soup can*, and *potted meat can*.

## 426 C Main Experiments (ConvNets Only)

427 In our primary experimental analysis, we conduct a comprehensive comparison of five visual repre-  
 428 sentations, with three of them being ConvNets, including our method. Figure 9 presents an isolated  
 429 demonstration of the comparison among the ConvNets. Notably, our method H-InDex exhibits  
 430 superior performance in comparison to the other ConvNets.

## 431 D Success Rates in Main Experiments

432 We present the success rates of our six task categories as in Table 1. Regarding the hammer task, it is  
 433 evident that both H-InDex and VC-1 exhibit success rates near 100%. However, a notable disparity  
 434 arises when considering episode returns, indicating the varying degrees of task execution proficiency  
 435 even among successful agents.

Table 1: **Success rates for main experiments.** Highest success rates for each task are marked with **bold** fonts.

| Task name / Method | RRL [25]    | R3M [17]    | MVP [29]                    | VC-1 [16]                  | H-InDex                     |
|--------------------|-------------|-------------|-----------------------------|----------------------------|-----------------------------|
| Hammer             | 89 $\pm$ 15 | 24 $\pm$ 21 | 83 $\pm$ 11                 | 97 $\pm$ 3                 | <b>100<math>\pm</math>0</b> |
| Door               | 92 $\pm$ 1  | 99 $\pm$ 2  | <b>100<math>\pm</math>0</b> | 99 $\pm$ 2                 | 96 $\pm$ 5                  |
| Pen                | 78 $\pm$ 4  | 58 $\pm$ 6  | 80 $\pm$ 4                  | 81 $\pm$ 2                 | <b>90<math>\pm</math>2</b>  |
| Pour               | 38 $\pm$ 33 | 0 $\pm$ 0   | 23 $\pm$ 38                 | 67 $\pm$ 29                | <b>99<math>\pm</math>2</b>  |
| Place inside       | 68 $\pm$ 48 | 2 $\pm$ 3   | 97 $\pm$ 4                  | <b>99<math>\pm</math>1</b> | <b>99<math>\pm</math>3</b>  |
| Relocate box       | 85 $\pm$ 14 | 45 $\pm$ 24 | 48 $\pm$ 50                 | 49 $\pm$ 50                | <b>94<math>\pm</math>5</b>  |

## 436 E Hyperparameters

437 We categorize hyperparameters into task-specific ones (Table 2) and task-agnostic ones (Table 3),  
 438 Across all baselines, all the hyperparameters are shared except the momentum  $m$ , which is only used  
 439 in our algorithm. All the hyperparameters for policy learning are the same as RRL [25]. This ensures  
 440 the comparison between different representations is fair.

441 Our exploration of the momentum  $m$  in Table 2 has been limited to a specific set of values, namely  
 442  $\{0, 0.1, 0.01, 0.001\}$ , through the use of a grid search technique, due to the limitation on computation  
 443 resources. It is observed that carefully tuning  $m$  could take more benefits.

Table 2: **Task-specific hyperparameters.**

| Task name / Variable     | Momentum $m$ | Demonstrations | Training steps (M) | Episode length |
|--------------------------|--------------|----------------|--------------------|----------------|
| Hammer                   | 0.1          | 25             | 2                  | 200            |
| Door                     | 0.0          | 25             | 4                  | 200            |
| Pen                      | 0.0          | 25             | 6                  | 100            |
| Pour                     | 0.0          | 50             | 8                  | 200            |
| Place inside             | 0.001        | 50             | 8                  | 200            |
| Relocate large clamp     | 0.01         | 50             | 8                  | 100            |
| Relocate foam brick      | 0.01         | 25             | 2                  | 100            |
| Relocate box             | 0.001        | 25             | 6                  | 100            |
| Relocate mug             | 0.0          | 25             | 8                  | 100            |
| Relocate mustard bottle  | 0.001        | 25             | 6                  | 100            |
| Relocate tomato soup can | 0.01         | 25             | 8                  | 100            |
| Relocate potted meat can | 0.0          | 25             | 4                  | 100            |

Table 3: **Task-agnostic hyperparameters.**

| Variable                            | Value                     |
|-------------------------------------|---------------------------|
| Dimension of image observations     | $224 \times 224 \times 3$ |
| Dimension of robot states           | 30                        |
| Dimension of actions                | 30                        |
| Hidden dimensions of policy $\pi$   | 256, 256                  |
| BC learning rate                    | 0.001                     |
| BC epochs                           | 5                         |
| BC batch size                       | 32                        |
| RL learning rate                    | 0.001                     |
| Number of trajectories for one step | 100                       |
| VF batch size                       | 64                        |
| VF epochs                           | 2                         |
| RL step size                        | 0.05                      |
| RL gamma                            | 0.995                     |
| RL gae                              | 0.97                      |
